# Supplementary material for: Unveiling Neuroprotection and Regeneration Mechanisms in Optic Nerve Injury: Insight from Neural Progenitor Cell Therapy with Focus on Vps35 and Syntaxin12
Source: Preprints.org preprint supplement (doi:10.20944/preprints202309.0190.v1), 2023-09-05
Supplement: Supplementary file 3 [file supplementary]

**Table S1. The following tables include all the primary and secondary antibodies use in Immunoblot and Immunofluorescence (IFA) analysis.**

| **Company** | **Primary antibody (Catalog Number)** | **Host** | **Application** |
| --- | --- | --- | --- |
| Abcam, Cambridge, UK | Anti-Hifα (ab2185) | Rabbit | Immunoblot (1:1000) |
| Anti-Gap43 (ab75810) | Rabbit | Immunoblot (1:1000)  IFA (1:200) |
| Anti-Mul1 (ab209263) | Rabbit | Immunoblot (1:1000) |
| Anti-p-β-catenin (ab11350) | Mouse | Immunoblot (1:1000) |
| Anti-Lonp1 (ab224316) | Rabbit | Immunoblot (1:1000) |
| Anti-Tuj1 (ab18207) | Rabbit | Immunoblot (1:1000)  IFA (1:200) |
| Genetex, CA, USA | Anti-Tnfα (GTX110520) | Rabbit | Immunoblot (1:1000) |
| Anti-Vegf (GTX102643) | Rabbit | Immunoblot (1:1000) |
| Anti-Wnt3a (GTX128101) | Rabbit | Immunoblot (1:1000) |
| Anti-β-catenin (GTX101435) | Rabbit | Immunoblot (1:1000) |
| Anti-Gsk3β (GTX111192) | Rabbit | Immunoblot (1:1000) |
| Anti-Lef1 (GTX12034) | Mouse | Immunoblot (1:1000) |
| Santa Cruz, CA, USA | Anti-Thy1 (SC-53116) | Mouse | Immunoblot (1:200) |
| Anti-Prdx5 (SC-133072) | Mouse | Immunoblot (1:1000) |
| Anti-IL6 (SC-57315) | Mouse | Immunoblot (1:1000) |
| Anti-β-actin (SC-47778) | Mouse | Immunoblot (1:1000) |
| Anti-Delphilin (SC-390952) | Mouse | Immunoblot (1:1000) |
| Anti-Atp5a (SC-136178) | Mouse | Immunoblot (1:1000) |
| Cell Signaling Technology, MA, USA | Anti-Nf (#2837) | Rabbit | Immunoblot (1:1000) |
| Anti-Mfn2 (#9482) | Rabbit | Immunoblot (1:1000) |
| Anti-Prdx2 (#46855) | Rabbit | Immunoblot (1:1000) |
| Anti-p-Gsk3β (#9366) | Rabbit | Immunoblot (1:1000) |
| Anti-Lc3b (#2775) | Rabbit | Immunoblot (1:1000) |
| Anti-Gfap (#3670) | Mouse | Immunoblot (1:1000)  IFA (1:200) |
| Invitrogen, MA, USA | Anti-Iba1 (PA5-27436) | Rabbit | Immunoblot (1:1000) |
| Anti-Vps35 (PA5-21898) | Rabbit | Immunoblot (1:1000) |
| Anti-Bdnf (PA5-85730) | Rabbit | Immunoblot (1:1000) |
| Millipore, MA, USA | Anti-Brn3a (MAB1585) | Mouse | Immunoblot (1:1000)  IFA (1:25) |
| Anti-NeuN (MAB377) | Mouse | Immunoblot (1:1000) |
| Proteintech, IL, USA | Anti-Syntaxin12 (14259-1-AP) | Rabbit | Immunoblot (1:1000)  IFA (1:50) |
| Anti-Vps45 (12006-1-AP) | Rabbit | Immunoblot (1:1000) |
| Novus Biologicals, CO, USA | Anti-Nlrp3 (NBP2-12446) | Rabbit | Immunoblot (1:1000) |
| MyBioSource, CA, USA | Anti-Mff (MBS9126329) | Rabbit | Immunoblot (1:1000) |
| NSJ Bioreagents, CA, USA | Anti-P62 (R31058) | Rabbit | Immunoblot (1:1000) |
